# Supplementary material
Source: Research Square preprint supplement (doi:10.21203/rs.3.rs-8906669/v1)
Supplement: Supplementary file 1 [file d01849057d68e2cb58ac6df8.xlsx]

## Sheet: Table S1
	Table S 1:: Multivariate Logistic Regression Output with Coefficients and 95% confidence intervals pre- and post-Surge 2.0
	Predictor	B	S.E.	Wald	df	Sig.	Exp(B)	95% CI for Exp(B)
	Gender (Male vs Female)	0.718	0.472	2.316	1	0.223	2.35	0.77 – 5.27
	Age (10–14 vs 1–9)	0.254	0.54	0.221	1	0.511	1.44	0.45 – 3.71
	County (Kajiado vs Nairobi)	1.338	0.582	5.292	1	0.012	3.92	1.42 – 10.2
	Modality (Index vs PITC)	0.833	0.409	4.144	1	0.032	2.7	1.55 – 4.14
	Facility Type (Other vs Public)	0.157	0.54	0.085	1	0.612	1.17	0.39 – 3.84
	Constant	−0.020	0.25	0.006	1	0.94	0.98	-

## Sheet: Table S2
	Table S 2:: Multivariable Logistic Regression Output with Coefficients and 95% Confidence Intervals HIV positive linkage pre and post Surge 2.0
	Predictor	B	S.E.	Wald	df	Sig.	Exp(B)	95% CI for Exp(B)
	Age (10–14 vs 1–10)	0.501	0.54	0.861	1	0.52	1.65	0.49 – 5.59
	Gender (Male vs Female)	1.155	0.472	5.987	1	0.02	3.17	1.12 – 9.02
	County (Kajiado vs Nairobi)	0.254	0.54	0.221	1	0.61	1.29	0.50 – 3.33
	Time to Linkage (Same Day vs >1 Day)	0.554	0.409	1.832	1	0.123	1.74	0.77 – 3.94
	WHO Staging (Other vs Stage 1)	1.295	0.582	4.944	1	0.03	3.65	1.03 – 12.9
	Constant	3.121	0.244	0.006	1	0.93	0.97	—
